# Supplementary material
Source: Royal Society of Chemistry journal article supplement (doi:10.1039/d5nj04241k)
Supplement: d5nj04241k1.pdf [file d5nj04241k1.pdf]

## Synthesis and evaluation of an environmentally benign terpolymer as a novel corrosion inhibitor for oil-well acidizing

Ayoub Awaji<sup>1</sup>, Tawfik A. Saleh<sup>1\*</sup>, Dheeraj Singh Chauhan<sup>2</sup>, Kashif Rahmani Ansari<sup>3</sup>,  
M.A. Quraishi<sup>2</sup>

<sup>1</sup>Department of Chemistry, King Fahd University of Petroleum and Minerals, Dhahran 31261, Saudi Arabia

<sup>2</sup>Centre for Green Chemistry and Sustainability, Department of Chemistry, Faculty of Basic Science, AKS University, Satna, Madhya Pradesh, 485001, India.

<sup>3</sup>State Key Laboratory of Oil and Gas Reservoir Geology and Exploration, Southwest Petroleum University, Chengdu, Sichuan 610500, China.

\*E-mail: tawfikas@hotmail.com; tawfik@kfupm.edu.sa

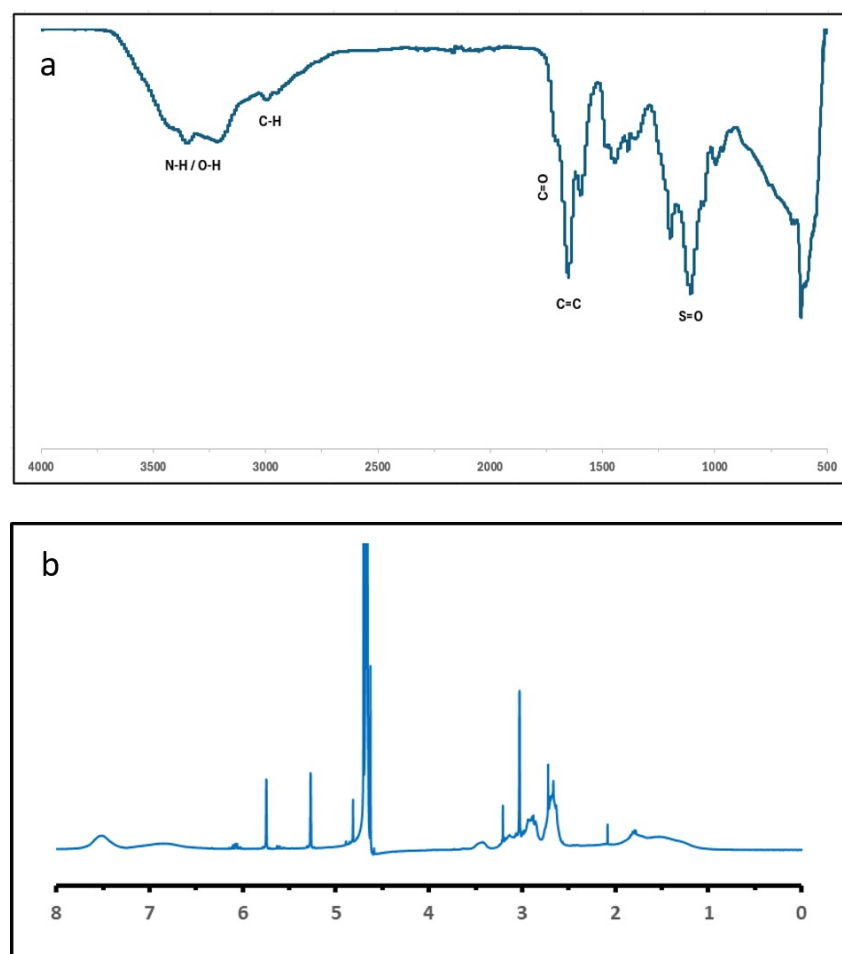

**Fig. S1** (a) FTIR and (b) <sup>1</sup>H NMR of synthesized PIAS.

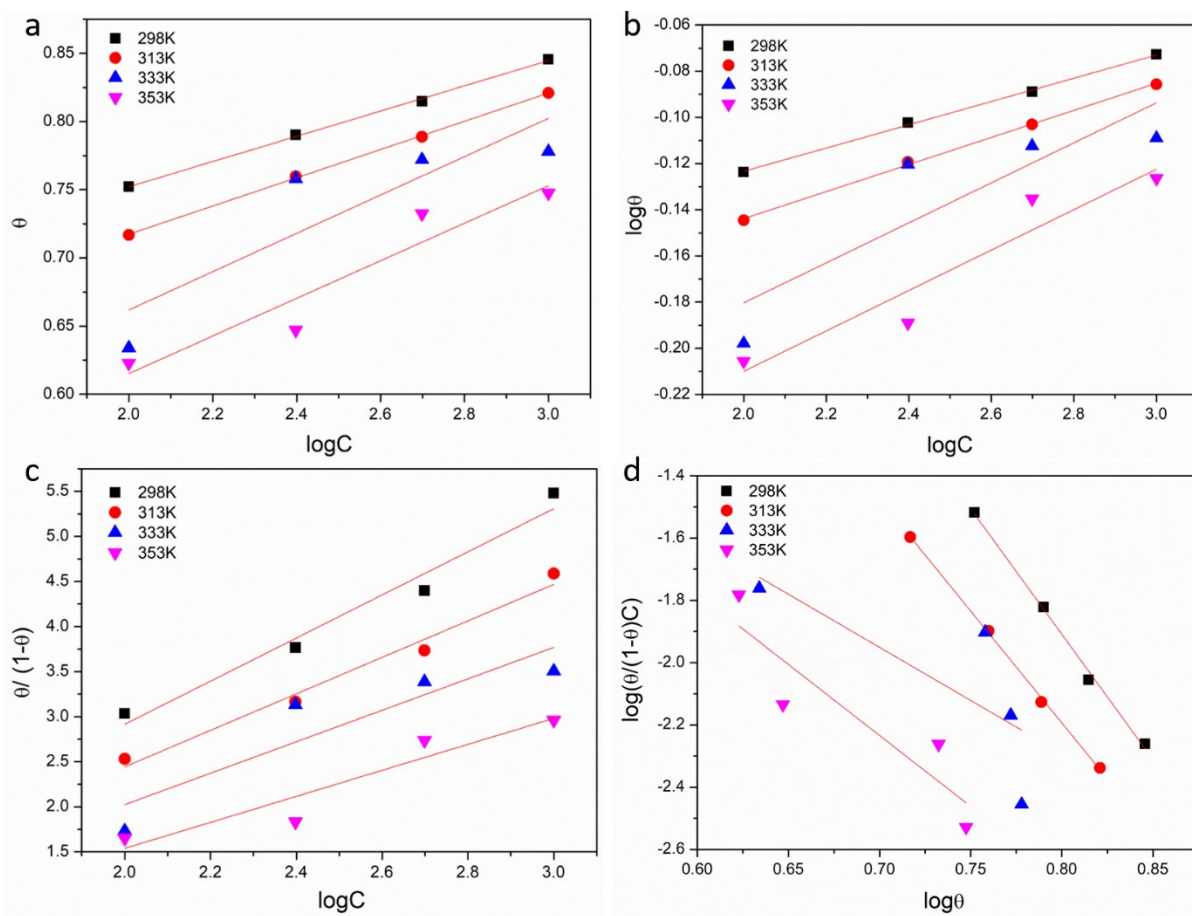

**Fig. S2** Plots of different adsorption isotherms used for fitting weight loss data (a) Temkin, (b) Freundlich, (c) El-Awady, (d) Frumkin isotherm.
